# Supplementary material
Source: PubMed Central journal article supplement (PMC4710962)
Supplement: NIHMS749284-supplement-Supplemental_File.pdf [file NIHMS749284-supplement-Supplemental_File.pdf]

## **Legends for supplemental figure and table**

### **Supplemental figure 1: Choice of ataxin-3-expressing flies**

A-C) Western blots of new transgenic *Drosophila* lines expressing UAS-ataxin-3 of the noted versions, driven by sqh-Gal4, which expresses UAS constructs in all fly tissues and throughout development and in adults (Franke et al., 2006; Franke et al., 2005; Todi et al., 2005). Ten one day-old flies were harvested in SDS lysis buffer, sonicated, boiled and centrifuged, then loaded on SDS-PAGE gels. Arrows indicate the lines we chose based on similarity of their protein levels to wild-type ataxin-3.

D, E) qRT-PCR from the various lines, showing higher expression of ataxin-3 transgenes that encode ataxin-3 with the Rad23 site mutated compared with wild-type ataxin-3, but whose protein levels are similar to those of wild-type ataxin-3 (panels A-C).

### **Supplemental table 1: *Drosophila* lines used**

Comprehensive list of the fly lines that we procured from Bloomington *Drosophila* Stock Center and Vienna RNAi *Drosophila* Center for our studies. Information includes the genotype, gene target for RNAi lines, catalog number, and fly orthologue for genes without a name designation, based on our own BLASTp searches using the NCBI BLAST tool.

## **Supplemental References**

Franke, J. D., et al., 2006. Native nonmuscle myosin II stability and light chain binding in *Drosophila melanogaster*. *Cell Motil Cytoskeleton*. 63, 604-22.

Franke, J. D., et al., 2005. Nonmuscle myosin II generates forces that transmit tension and drive contraction in multiple tissues during dorsal closure. *Curr Biol*. 15, 2208-21.

Todi, S. V., et al., 2005. Myosin VIIA defects, which underlie the Usher 1B syndrome in humans, lead to deafness in *Drosophila*. *Curr Biol*. 15, 862-8.

## Supplemental figure 1

The protein levels of Ataxin-3 transgene flies

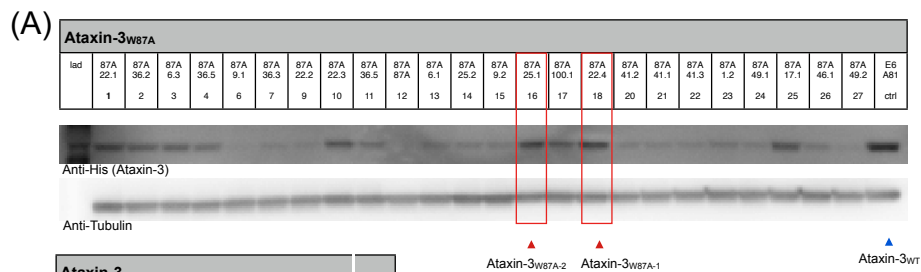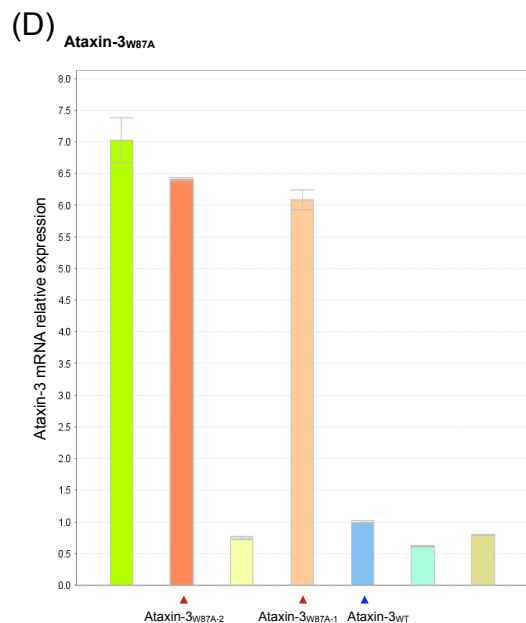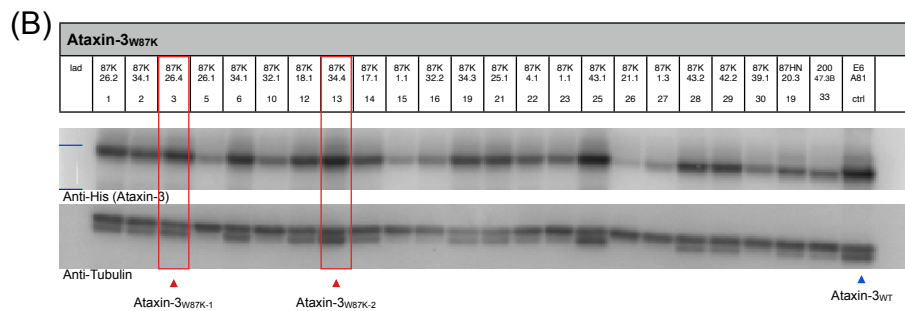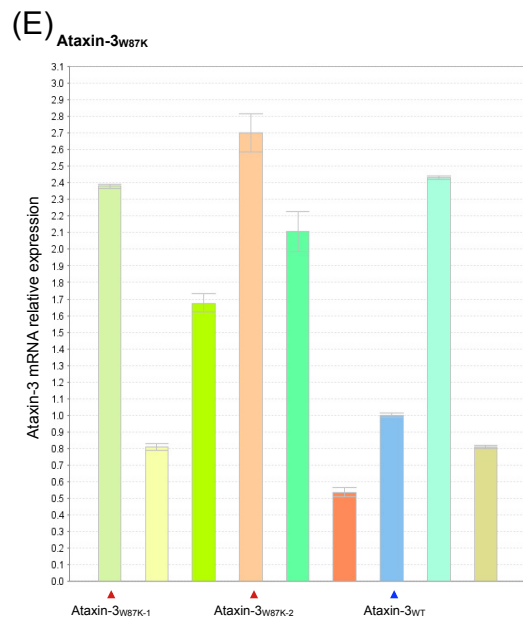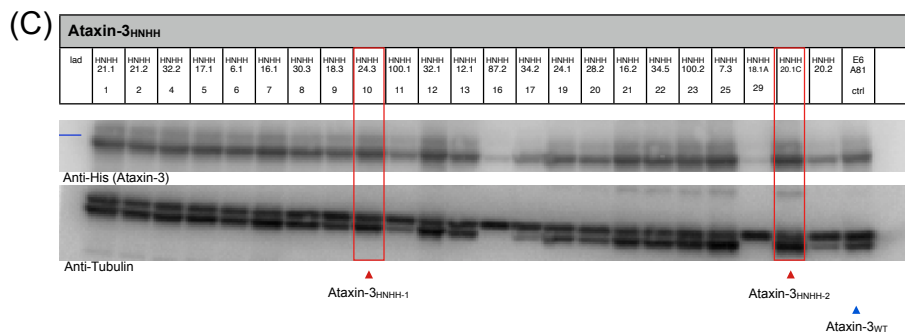

Supplemental Table 1

| Genotype                                                                        | Source      | FlyBase ID  | Stock Number | Associated alleles | Description                                         | Shown in the figures |
|---------------------------------------------------------------------------------|-------------|-------------|--------------|--------------------|-----------------------------------------------------|----------------------|
| w <sup>[1118]</sup> ; +; +                                                      | Bloomington | FBal0018186 | 3605         |                    | Isogenic host strain for the Ataxin-3 line          | Yes                  |
| w <sup>[*]</sup> ; +; P{w[+mC]=longGMR-GAL4}3                                   | Bloomington | FBst0008121 | 8121         |                    | gmr-Gal4                                            | Yes                  |
| w <sup>[*]</sup> ; P{w[+mC]=longGMR-GAL4}2; +                                   | Bloomington | FBst0009146 | 9146         |                    | gmr-Gal4                                            | Yes                  |
| w <sup>[*]</sup> ; P{w[+mC]=UAS-HsapMJD.tr-Q78}c211.2; +                        | Bloomington | FBst0008150 | 8150         | Ataxin-3           | UAS-PolyQ <sup>78</sup>                             | Yes                  |
| w <sup>[*]</sup> ; P{w[+mC]=UAS-HsapMJD.tr-Q78}c37.3/TM3, Sb[1]                 | Bloomington | FBst0008141 | 8141         | Ataxin-3           | UAS-PolyQ <sup>78</sup>                             | Yes                  |
| w <sup>[*]</sup> ; P{w[+mC]=UAS-ataxin-3-WT}E6.2; +                             | Todi Lab    |             |              | Ataxin-3           | UAS-Ataxin-3-WT                                     | Yes                  |
| w <sup>[*]</sup> P{w[+mC]=UAS-ataxin-3-WT}E2.1; +; +                            | Todi Lab    |             |              | Ataxin-3           | UAS-Ataxin-3-WT                                     | Yes                  |
| w <sup>[*]</sup> ; P{w[+mC]=UAS-ataxin-3-C14A}E12.2; +                          | Todi Lab    |             |              | Ataxin-3           | UAS-Ataxin-3-C14A                                   | Yes                  |
| w <sup>[*]</sup> ; P{w[+mC]=UAS-ataxin-3-HNHH}E1101.2; +                        | Todi Lab    |             |              | Ataxin-3           | UAS-ataxin-3-HNHH <sub>1</sub>                      | Yes                  |
| w <sup>[*]</sup> ; P{w[+mC]=UAS-ataxin-3-HNHH}E1102.2; +                        | Todi Lab    |             |              | Ataxin-3           | UAS-ataxin-3-HNHH <sub>2</sub>                      | Yes                  |
| w <sup>[*]</sup> ; P{w[+mC]=UAS-ataxin-3-W87K}E1007.2; +                        | Todi Lab    |             |              | Ataxin-3           | UAS-ataxin-3-W87K <sub>1</sub>                      | Yes                  |
| w <sup>[*]</sup> ; +; P{w[+mC]=UAS-ataxin-3-W87K}E1004.3                        | Todi Lab    |             |              | Ataxin-3           | UAS-ataxin-3-W87K <sub>2</sub>                      | Yes                  |
| w <sup>[*]</sup> ; +; P{w[+mC]=UAS-ataxin-3-W87A}E908.3                         | Todi Lab    |             |              | Ataxin-3           | UAS-ataxin-3-W87A <sub>1</sub>                      | Yes                  |
| w <sup>[*]</sup> ; +; P{w[+mC]=UAS-ataxin-3-W87A}E911.3                         | Todi Lab    |             |              | Ataxin-3           | UAS-ataxin-3-W87A <sub>2</sub>                      | Yes                  |
| y,w <sup>[1118]</sup> ; +; +                                                    | VDRC        |             | VDRC60000    |                    | Isogenic host strain for VDRC library               | Yes                  |
| y[1] v[1]; P{y[+t7.7]=CaryP}attP2                                               | Bloomington | FBst0036303 | 36303        |                    | Isogenic host strain for attP2                      | Yes                  |
| y[1] v[1]; P{y[+t7.7]=CaryP}attP40                                              | Bloomington | FBst0036304 | 36304        |                    | Isogenic host strain for attP40                     | Yes                  |
| P{KK107826}VIE-260B                                                             | VDRC        | FBst0476212 | v104354      | CG1836             | Rad23 RNAi                                          | Yes                  |
| w <sup>[1118]</sup> ; P{GD4245}v30498                                           | VDRC        | FBst0458518 | v30498       | CG1836             | Rad23 RNAi                                          | No                   |
| y[1] sc <sup>[*]</sup> v[1]; P{y[+t7.7] v[+t1.8]=TRiP.HM05268}attP2/TM3, Sb[1]  | Bloomington | FBst0031875 | 31875        | CG7425             | UbcH5 ( <i>effete</i> ) RNAi                        | Yes                  |
| P{KK109208}VIE-260B                                                             | VDRC        | FBst0476336 | v104478      | CG7220             | CG7220(Ube2W) RNAi                                  | Yes                  |
| w <sup>[1118]</sup> ; P{GD10597}v34199                                          | VDRC        | FBst0460510 | v34199       | CG7220             | CG7220(Ube2W) RNAi                                  | No                   |
| y[1] sc <sup>[*]</sup> v[1]; P{y[+t7.7] v[+t1.8]=TRiP.HMS00986}attP2            | Bloomington | FBst0034017 | 34017        | CG5203             | Chip RNAi                                           | Yes                  |
| y[1] sc <sup>[*]</sup> v[1]; P{y[+t7.7] v[+t1.8]=TRiP.HMS00889}attP2            | Bloomington | FBst0033938 | 33938        | CG5203             | Chip RNAi                                           | No                   |
| y[1] v[1]; P{y[+t7.7] v[+t1.8]=TRiP.JF02691}attP2                               | Bloomington | FBst0027540 | 27540        | CG9934             | Ube4b RNAi                                          | Yes                  |
| y[1] sc <sup>[*]</sup> v[1]; P{y[+t7.7] v[+t1.8]=TRiP.HMS01651}attP40           | Bloomington | FBst0037509 | 37509        | CG10523            | Parkin RNAi                                         | Yes                  |
| y[1] v[1]; P{y[+t7.7] v[+t1.8]=TRiP.JF01200}attP2                               | Bloomington | FBst0031259 | 31259        | CG10523            | Parkin RNAi                                         | No                   |
| y[1] sc <sup>[*]</sup> v[1]; P{y[+t7.7] v[+t1.8]=TRiP.HMS01800}attP2/TM3, Sb[1] | Bloomington | FBst0038333 | 38333        | CG10523            | Parkin RNAi                                         | No                   |
| w <sup>[1118]</sup> ; P{GD3145}v6870                                            | VDRC        | FBst0470477 | v6870        | CG1937             | Hrd1 RNAi                                           | Yes                  |
| P{KK102436}VIE-260B                                                             | VDRC        | FBst0478883 | v107060      | CG1937             | Hrd1 RNAi                                           | No                   |
| w <sup>[1118]</sup> ; P{GD8888}v19272                                           | VDRC        | FBst0453458 | v19272       | CG18174            | PSMD14 RNAi                                         | Yes                  |
| w <sup>[1118]</sup> P{GD8888}v19273                                             | VDRC        | FBst0453459 | v19273       | CG18174            | PSMD14 RNAi                                         | No                   |
| P{KK101319}VIE-260B                                                             | VDRC        | FBst0480383 | v108573      | CG3416             | PSMD7 RNAi                                          | Yes                  |
| w <sup>[1118]</sup> P{GD10960}v26183                                            | VDRC        | FBst0456281 | v26183       | CG3416             | PSMD7 RNAi                                          | No                   |
| Prosbeta6[1] pb[1] p[p]/TM3, Sb[1] Ser[1]                                       | Bloomington | FBst0006182 | 6182         | CG4097             | Proteasome β6 subunit T18L. (DTS5)                  | Yes                  |
| w <sup>[1118]</sup> ; P{w[+mC]=UAS-Prosbeta6[1].B}2B; P{UAS-Prosbeta2[1]}1B     | Bloomington | FBst0006787 | 6787         | CG4097, CG3329     | Prosbeta2&6; dominant negative proteasome subunits. | Yes                  |
| w <sup>[1118]</sup> ; P{w[+mC]=UAS-Prosbeta6[1].B}2B                            | Bloomington | FBst0006786 | 6786         | CG4097             | Prosbeta6; dominant negative proteasome subunits.   | No                   |
| P{KK105338}VIE-260B                                                             | VDRC        | FBst0480005 | v108193      | CG10369            | P62 RNAi                                            | Yes                  |
| y[1] sc <sup>[*]</sup> v[1]; P{y[+t7.7] v[+t1.8]=TRiP.HMS00938}attP2            | Bloomington | FBst0033978 | 33978        | CG10369            | P62 RNAi                                            | No                   |
| y[1] sc <sup>[*]</sup> v[1]; P{y[+t7.7] v[+t1.8]=TRiP.HMS00551}attP2            | Bloomington | FBst0036111 | 36111        | CG10369            | P62 RNAi                                            | No                   |
| w <sup>[1118]</sup> ; P{GD11671}v45558                                          | VDRC        | FBst0466207 | v45558       | CG5489             | Atg7 RNAi                                           | Yes                  |
| w <sup>[1118]</sup> ; P{GD11671}v45560/TM3                                      | VDRC        | FBst0466209 | v45560       | CG5489             | Atg7 RNAi                                           | No                   |
| y[1] v[1]; P{y[+t7.7] v[+t1.8]=TRiP.JF02787}attP2                               | Bloomington | FBst0027707 | 27707        | CG5489             | Atg7 RNAi                                           | No                   |

|                                                                     |             |             |         |         |                       |     |
|---------------------------------------------------------------------|-------------|-------------|---------|---------|-----------------------|-----|
| y[1] sc[*] v[1]; P{y[+t7.7] v[+t1.8]=TRiP.HMS01358}attP2/TM3, Sb[1] | Bloomington | FBst0034369 | 34369   | CG5489  | Atg7 RNAi             | No  |
| y[1] sc[*] v[1]; P{y[+t7.7] v[+t1.8]=TRiP.HMS01328}attP2            | Bloomington | FBst0034340 | 34340   | CG32672 | Atg8a RNAi            | Yes |
| y[1] v[1]; P{y[+t7.7] v[+t1.8]=TRiP.JF02895}attP2 e[*]/TM3, Sb[1]   | Bloomington | FBst0028989 | 28989   | CG32672 | Atg8a RNAi            | No  |
| y[1] v[1]; P{y[+t7.7] v[+t1.8]=TRiP.JF02704}attP2                   | Bloomington | FBst0027552 | 27552   | CG18402 | Atg12 RNAi            | Yes |
| y[1] sc[*] v[1]; P{y[+t7.7] v[+t1.8]=TRiP.HMS01153}attP2            | Bloomington | FBst0034675 | 34675   | CG18402 | Atg12 RNAi            | No  |
| w[1118]; P{GD15230}v29791/CyO                                       | VDRC        | FBst0458151 | v29791  | CG18402 | Atg12 RNAi            | No  |
| w[*]; P{w[+mC]=UAS-DnaJ-1.K}3                                       | Bloomington | FBst0030553 | 30553   | CG10578 | UAS-DnaJ-1            | Yes |
| y[1] sc[*] v[1]; P{y[+t7.7] v[+t1.8]=TRiP.HMS00688}attP2/TM3, Sb[1] | Bloomington | FBst0032899 | 32899   | CG10578 | DnaJ-1 RNAi           | Yes |
| y[1] sc[*] v[1]; P{y[+t7.7] v[+t1.8]=TRiP.HMS00778}attP2            | Bloomington | FBst0032978 | 32978   | CG10578 | DnaJ-1 RNAi           | No  |
| P{KK108978}VIE-260B                                                 | VDRC        | FBst0473405 | v101532 | CG5001  | CG5001 RNAi           | Yes |
| y[1] sc[*] v[1]; P{y[+t7.7] v[+t1.8]=TRiP.HMS00386}attP2            | Bloomington | FBst0032392 | 32392   | CG5001  | CG5001 RNAi           | No  |
| w[1118]; P{GD15063}v39126                                           | VDRC        | FBst0462845 | v39126  | CG8448  | mrj RNAi              | Yes |
| w[1118]; P{GD2776}v44395                                            | VDRC        | FBst0465559 | v44395  | CG7130  | CG7130 RNAi           | Yes |
| P{KK111794}VIE-260B                                                 | Bloomington | FBst0482096 | v110526 | CG7130  | CG7130 RNAi           | No  |
| y[1] v[1]; P{y[+t7.7] v[+t1.8]=TRiP.JF02415}attP2/TM3, Sb[1]        | Bloomington | FBst0027070 | 27070   | CG5748  | Hsf RNAi              | Yes |
| y[1] v[1]; P{y[+t7.7] v[+t1.8]=TRiP.GL00698}attP2                   | Bloomington | FBst0041581 | 41581   | CG5748  | Hsf RNAi              | No  |
| w[1118]; P{GD16368}v48692                                           | VDRC        | FBst0468066 | v48692  | CG5748  | Hsf RNAi              | No  |
| P{KK100723}VIE-260B                                                 | VDRC        | FBst0480645 | v108851 | CG5748  | Hsf RNAi              | No  |
| net[1] cn[1] Hsf[1]/CyO                                             | Bloomington | FBst0005491 | 5491    | CG5748  | Hsf mutant allele     | No  |
| y[1] v[1]; P{y[+t7.7] v[+t1.8]=TRiP.JF03136}attP2                   | Bloomington | FBst0028709 | 28709   | CG4264  | Hsc70-4 RNAi          | Yes |
| y[1] sc[*] v[1]; P{y[+t7.7] v[+t1.8]=TRiP.HMS00152}attP2/TM3, Sb[1] | Bloomington | FBst0034836 | 34836   | CG4264  | Hsc70-4 RNAi          | No  |
| y[1] sc[*] v[1]; P{y[+t7.7] v[+t1.8]=TRiP.GLV21049}attP2            | Bloomington | FBst0035684 | 35684   | CG4264  | Hsc70-4 RNAi          | No  |
| w[126]; P{w[+mC]=UAS-Hsc70-4.D206S}E                                | Bloomington | FBst0005844 | 5844    | CG4264  | Hsc70-4 mutant allele | No  |
| w[126]; P{w[+mC]=UAS-Hsc70-4.K71S}G                                 | Bloomington | FBst0005845 | 5845    | CG4264  | Hsc70-4 mutant allele | No  |
| y[1] sc[*] v[1]; P{y[+t7.7] v[+t1.8]=TRiP.HMS00397}attP2            | Bloomington | FBst0032402 | 32402   | CG4147  | Hsc70-3 RNAi          | Yes |
| w[1118]; P{GD6484}v14882                                            | VDRC        | FBst0451655 | v14882  | CG4147  | Hsc70-3 RNAi          | No  |
| P{KK109452}VIE-260B                                                 | VDRC        | FBst0473639 | v101766 | CG4147  | Hsc70-3 RNAi          | No  |
| P{KK104957}VIE-260B                                                 | VDRC        | FBst0472742 | v100869 | CG10973 | CG10973 RNAi          | Yes |
| w[1118]; P{GD7153}v41463                                            | VDRC        | FBst0464110 | v41463  | CG10973 | CG10973 RNAi          | No  |
| y[1] sc[*] v[1]; P{y[+t7.7] v[+t1.8]=TRiP.HMS00807}attP2            | Bloomington | FBst0033007 | 33007   | CG4466  | Hsp27 RNAi            | Yes |
| y[1] sc[*] v[1]; P{y[+t7.7] v[+t1.8]=TRiP.HMS00867}attP2            | Bloomington | FBst0033922 | 33922   | CG4466  | Hsp27 RNAi            | No  |
| P{KK107896}VIE-260B                                                 | VDRC        | FBst0472570 | v100697 | CG12101 | Hsp60 RNAi            | Yes |
| w[1118]; P{GD7481}v18738                                            | VDRC        | FBst0453228 | v18738  | CG12101 | Hsp60 RNAi            | No  |
| y[1] sc[*] v[1]; P{y[+t7.7] v[+t1.8]=TRiP.HMS01209}attP2/TM3, Sb[1] | Bloomington | FBst0034729 | 34729   | CG12101 | Hsp60 RNAi            | No  |
| y[1] sc[*] v[1]; P{y[+t7.7] v[+t1.8]=TRiP.HMS00796}attP2            | Bloomington | FBst0032996 | 32996   | CG1242  | Hsp83 RNAi            | Yes |
| y[1] sc[*] v[1]; P{y[+t7.7] v[+t1.8]=TRiP.HMS00899}attP2            | Bloomington | FBst0033947 | 33947   | CG1242  | Hsp83 RNAi            | No  |
